# Supplementary material for: Camptothecin Induces PD-L1 and Immunomodulatory Cytokines in Colon Cancer Cells
Source: Medicines (Basel). 2019 Apr 24;6(2):51. doi: 10.3390/medicines6020051 (PMC6631458; doi:10.3390/medicines6020051)
Supplement: Supplementary file 1 [file medicines-06-00051-s001.pdf]

# Supplementary Materials: Camptothecin Induces PD-L1 and Immunomodulatory Cytokines in Colon Cancer Cells

Deepa Bedi, Henry J. Henderson, Upender Manne and Temesgen Samuel

**Table S1.** Cytokines with an overall downregulation by treatment of SW620 cells with CPT. The list was sorted in decreasing order for fold expression reduced by 1  $\mu$ M CPT.

| Gene  | Overall Down by CPT Treatment vs Control |           |                                                                                                                                             |
|-------|------------------------------------------|-----------|---------------------------------------------------------------------------------------------------------------------------------------------|
|       | 1 $\mu$ M                                | 5 $\mu$ M | Major functions summary                                                                                                                     |
| XCL1  | -10.9                                    | -13.4     | X-C Motif Chemokine Ligand 1; Chemotactic for T-cells; antimicrobial                                                                        |
| C5    | -4.6                                     | -5.1      | Complement component 5                                                                                                                      |
| IL-27 | -2.9                                     | -4.8      | Interleukin 27; Potentiate TH1 response; suppress pro-inflammatory cytokines IL2, IL4, IL5, IL6; Inhibit TH17 activity and IL17 production  |
| VEGFA | -2.0                                     | -3.4      | Vascular Endothelial Growth Factor A; Endothelial cell mitogen; Induces endothelial cell migration, and angiogenesis; Increase permeability |
| FASLG | -1.9                                     | -3.0      | Fas Ligand; T-cell apoptosis                                                                                                                |
| HPRT1 | -1.5                                     | -2.4      | Hypoxanthine Phosphoribosyltransferase 1; Purine nucleotide synthesis                                                                       |

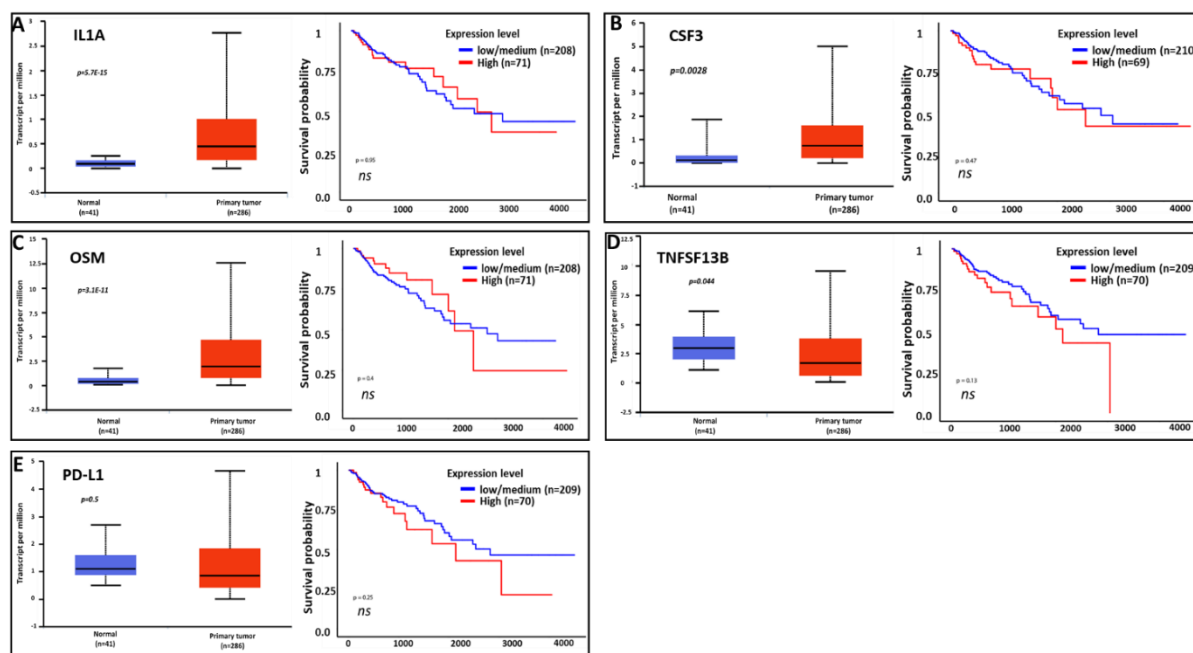

**Figure S1.** Expression profiles and patient survival probabilities for additional CPT-responsive cytokine genes. The TCGA database was probed for clinical significance by using the UALCAN portal. Graphs (A–E) for 5 additional genes, IL-1A, CSF3, OSM, TNFSF13B, and PD-L1, respectively, with their corresponding significance values in expression and/or survival probability are shown. Bar graphs show comparison of gene expression between normal and primary tumor, whereas the line graphs show effect of gene expression level on COAD patient survival.  $n$  is the sample size.  $ns$  = not significant. Note that, in the COAD dataset, PD-L1 expression is not significantly different between normal and primary tumors, nor are its expression levels associated with patient survival.

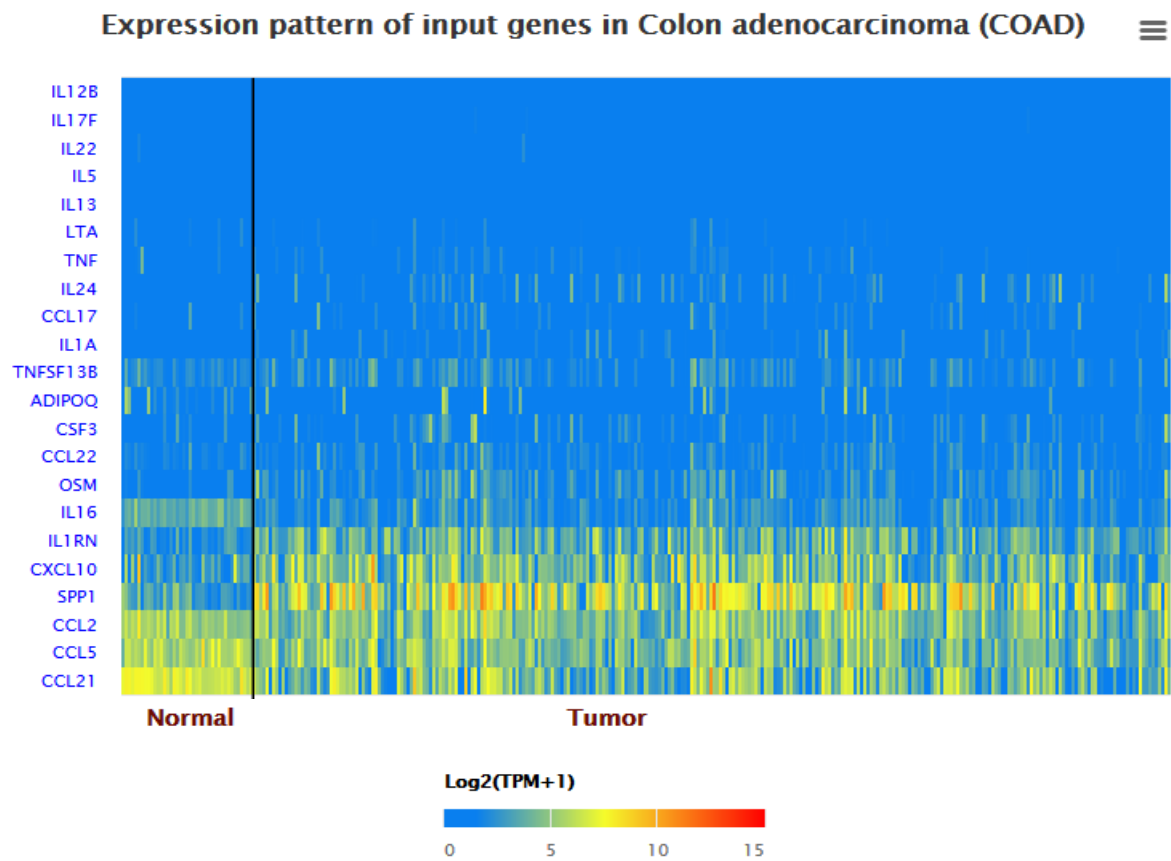

**Figure S2.** Expression profile heat map for 22 CPT-responsive cytokine genes identified using the TCGA COAD dataset showing differential expression between normal and tumor tissues of a number of CPT-responsive genes.
